# Supplementary material
Source: publisher figshare collection journal article supplement (https://acs.figshare.com/ndownloader/files/5735754)
Supplement: Supplementary file 1 [file 5735754]

## Experimental Procedures

### Synthesis of **1**:

Zinc acetate (0.493g, 2.68 mmol) was dissolved in tetrahydrofuran (65 mL) by the addition of TMEDA (0.61 mL, 4.02 mmol). Bis(trimethylsilyl)selenide (1.16 mL, 6.36 mmol) was then added at 0°C, and the resulting clear, colorless solution was stirred for 15 minutes. 200 mL of cold (-25°C) pentane was then added, and the reaction mixture was stored at -78°C to avoid decomposition of the complex, as demonstrated by the formation of  $\text{Se}(\text{SiMe}_3)_2$  after overnight storage in THF at 0°C. Single colorless, needle-like crystals suitable for X-ray crystallography formed from the reaction solution at -78°C after 3 days. Yield 92%;  $^1\text{H}$  NMR ( $\text{CDCl}_3$ , 223K):  $\delta$  0.43(s) (-SiMe<sub>3</sub>),  $\delta$  2.62(s) (NCH<sub>2</sub>),  $\delta$  2.53(s) (NCH<sub>3</sub>);  $^{13}\text{C}\{^1\text{H}\}$  NMR ( $\text{CDCl}_3$ , 223K):  $\delta$  6.09 (-SiMe<sub>3</sub>),  $\delta$  56.29 (NCH<sub>2</sub>),  $\delta$  48.25 (NCH<sub>3</sub>),  $^{29}\text{Si}$  NMR ( $\text{CDCl}_3$ , 223K)  $\delta$  6.34,  $^{77}\text{Se}$  NMR ( $\text{CDCl}_3$ , 223K)  $\delta$  -512. Attempts to obtain elemental analysis were unsuccessful due to the thermal instability of the complex, evidenced by a slight yellowing of the pure crystalline solid after storage at room temperature in an inert atmosphere for 24 hours. The solid, however, can be stored at low temperature (-40°C) for extended periods.

### Synthesis of **2**:

Cadmium acetate (0.25 g, 1.09 mmol) was dissolved in THF (35 mL) with  $\text{PnPr}_3$  (0.65 mL, 3.27 mmol), followed by the addition of  $\text{PhSeSiMe}_3$  (0.27 mL, 1.09 mmol). The resulting colorless solution was cooled to -78°C and added to a freshly prepared solution of **1** (0.54 mmol) with excess TMEDA, also at -78°C. Upon warming to room temperature, a pale yellow solution was obtained. Reduction of the volume by ~50%, followed by the addition

of Et<sub>2</sub>O (6 mL) and cooling to -30°C produced pale yellow needle-like crystals suitable for X-ray crystallographic analysis. Yield 60%.

#### Synthesis of **3**:

A solution of the tellurolate analogue of **1**, (*N,N'*-tmeda)Zn(TeSiMe<sub>3</sub>)<sub>2</sub>, synthesized *via* the addition of Te(SiMe<sub>3</sub>)<sub>2</sub> (0.46 mL, 2.18 mmol) to a solution of TMEDA (0.24 mL, 1.62 mmol) and Zn(OAc)<sub>2</sub> (0.20 g, 1.09 mmol) in 70 mL THF at -78°C, was prepared. This solution was immediately added to a pale yellow solution of cadmium acetate (0.50 g, 2.18 mmol), PEt<sub>3</sub> (0.96 mL, 6.54 mmol), and PhTeSiMe<sub>3</sub> (0.50 mL, 2.18 mmol), also at -78°C. The reaction is allowed to warm slowly to -5°C overnight, yielding a bright yellow solution with a small amount of a bright yellow crystalline solid. The solution was filtered and stored undisturbed at room temperature in the absence of light, from which bright yellow single crystals suitable for X-ray crystallography form after three days. Yield 32%.

#### Characterization of **1-3**

Elemental analysis calculated for C<sub>74</sub>H<sub>126</sub>N<sub>10</sub>O<sub>2</sub>Zn<sub>5</sub>Cd<sub>11</sub>Se<sub>19</sub>: C, 20.88; H, 2.99. Found: C, 21.49, H, 2.33.

Elemental analysis calculated for C<sub>70</sub>H<sub>118</sub>N<sub>10</sub>OZn<sub>5</sub>Cd<sub>11</sub>Te<sub>19</sub>: C, 16.42, H, 2.33. Found: C, 15.67, H, 1.79.

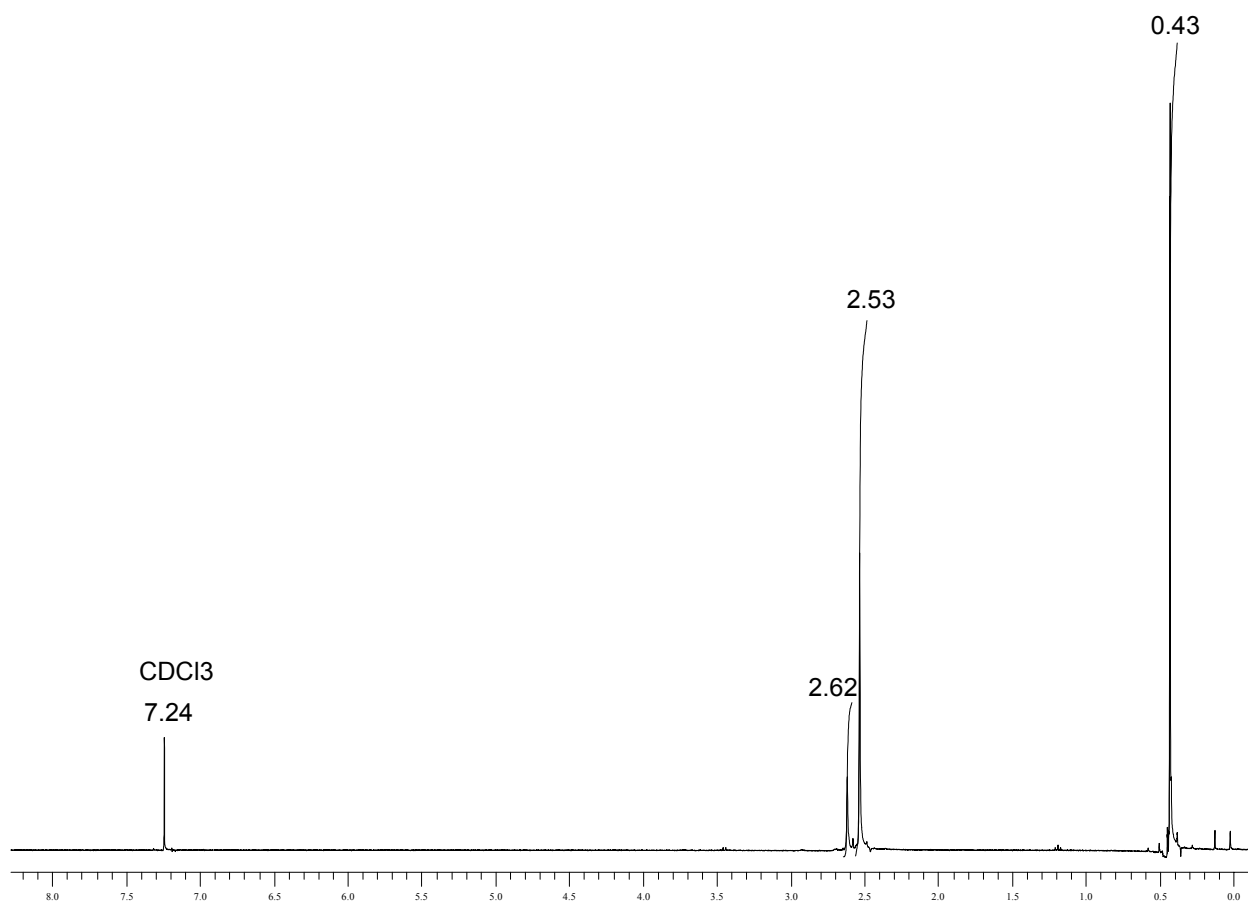

**Figure S1.**  $^1\text{H}$  NMR spectrum of complex **1** in  $\text{CDCl}_3$ .
